# Supplementary material for: Ambient air quality in the Kathmandu Valley, Nepal, during the pre-monsoon: concentrations and sources of particulate matter and trace gases
Source: Copernicus journal article supplement (doi:10.5194/acp-20-2927-2020), 2020-03-11
Supplement: Supplementary file 1 [file acp-20-2927-2020-supplement.zip]

Archive with 3 entries (3 files):
- acp-20-2927-2020-supplement-title-page.pdf
- Supplemental Information Text.docx
- Table S1-S2.xlsx
