# Supplementary material for: Ambient air quality in the Kathmandu Valley, Nepal, during the pre-monsoon: concentrations and sources of particulate matter and trace gases
Source: Copernicus journal article supplement (doi:10.5194/acp-20-2927-2020), 2020-03-11
Supplement: Supplementary file 1 [file acp-20-2927-2020-supplement.zip › acp-20-2927-2020-supplement-title-page.pdf]

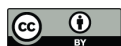

*Supplement of*

**Ambient air quality in the Kathmandu Valley, Nepal, during the pre-monsoon: concentrations and sources of particulate matter and trace gases**

**Md. Robiul Islam et al.**

*Correspondence to:* Elizabeth A. Stone ([betsy-stone@uiowa.edu](mailto:betsy-stone@uiowa.edu))

- [acp-20-2927-2020-supplement-title-page.pdf](#)
- [Supplemental Information Text.docx](#)
- [Table S1-S2.xlsx](#)

The copyright of individual parts of the supplement might differ from the CC BY 4.0 License.
