# Supplementary material for: Ambient air quality in the Kathmandu Valley, Nepal, during the pre-monsoon: concentrations and sources of particulate matter and trace gases
Source: Copernicus journal article supplement (doi:10.5194/acp-20-2927-2020), 2020-03-11
Supplement: Supplementary file 1 [file acp-20-2927-2020-supplement.zip › Supplemental Information Text.docx]

**Supplemental Information**

**SI section S-1: Detailed description of the extraction and analysis of organic species.** Prior to extraction, filters were spiked with isotopically labelled internal standards: pyrene-D10, benz(a)anthracene-D12, cholestane-D4, pentadecane-D32, eicosane-D42, tetracosane-D50, triacontane-D62, dotriacontane-D66, hexatriacontane-D74, levoglucosan-13C6 and cholesterol D6. Filters were extracted using two 20 mL portions of hexanes (Optima, 99.9%) then two 20 mL portions of acetone (CHROMASOLV®, for HPLC, ≥99.9%) by ultra-sonication (Branson 5510) at 42 kHz frequency and 20-25 oC temperature for 10 min each as described in Al-Naiema et al. (2015). After extraction, the extract was combined and the volume was reduced to ~4 mL under high purity N2 (PRAXAIR Inc.; Zymark Turbo-Vap II, LV, Caliper Life Science). The extract was filtered using a 0.2 µm PTFE filter (Whatman, GE Health Care Life Sciences) and further evaporated to ~1 mL under high purity N2 (Reacti-Vap I, Thermo Scientific). Extracts were stored in amber vials at -20 oC. Immediately prior to analysis, extracts were evaporated to a final volume of 100 µL under high purity N2.

Samples were directly analyzed for nonpolar organic species, including polycyclic aromatic hydrocarbons, hopanes, and alkanes. Hydroxyl and carboxylic acid-bearing analytes, including levoglucosan, methyltetrols, and phthalic acids underwent silylation derivatization prior to analysis as described by Stone et al. (2012) to convert active hydrogen atoms to trimethylsilyl (TMS) groups (Nolte et al., 2002). For this derivitization, a 10 µL aliquot of the extract was dried at 30 oC under gentle nitrogen flow, then 10 µL of pyridine (Burdick & Jackson, Anhydrous) and 20 µL of the silylation agent N,O-bis(trimethylsilyl)trifluoro-acetamide (Fluka Analytical 99%) were added. The mixture was heated at 70 oC for 3 h before analysis by GC-MS.

Instrumental analysis utilized a gas chromatograph coupled with a mass spectrometer (GC-MS, Agilent Technologies GC-MS 7890A) equipped with an Agilent DB-5 column (30 m x 0.25 mm x 0.25 µm) and electron ionization (EI) source with a temperature program described in Stone et al. (2012). In brief, non-polar organic species were analyzed by injecting 2 µL aliquots to the GC inlet operating in the splitless mode at 300 oC. The separation was achieved with an initial oven temperature of 65 oC, held for 10 min, and then ramped at a rate of 10 oC min-1 to 300 oC and held for 26.5 min. For the analysis of silylated samples, 2.0 mL of each sample was injected to the GC inlet operating in the splitless mode at 270 oC. The initial GC oven temperature was 84 oC, held for 1 min, then increased at a rate of 8 oC min-1 to 200 oC and held for 2 min, and then ramped at a rate of 10 oC min-1 to 300 oC and held for 15 min. For all analyses, the GC–MS interface was held at 300 oC, the MS quadrupole and source were operated at 150 oC and 230 oC, respectively. Responses of analytes were normalized to the corresponding isotopically-labeled internal standard and quantified with five point linear calibration curves (with correlation coefficients, R2≥0.995).

**Table S3**: Mean (± standard deviation) PM mass fractions (as %) of water-soluble inorganic ions. P-values correspond to the comparison of the mass fractions in PM2.5 and PM10 (n = 27 each). Stars (*) indicates the ions whose mass fractions to PM2.5 and PM10 differ significantly.

| **Water-soluble ion** | **% of PM2.5** |  | **% of PM10** | **p-value** |
| --- | --- | --- | --- | --- |
| Ammonium | 8.87 ± 3.02 |  | 5.88 ± 2.45 | <0.001* |
| Sodium | 0.19 ± 0.28 |  | 1.07 ± 1.76 | 0.83 |
| Potassium | 1.01 ± 0.40 |  | 0.56 ± 0.17 | <0.001* |
| Magnesium | 0.05 ± 0.07 |  | 0.19 ± 0.14 | 0.01* |
| Calcium | 0.97 ± 1.29 |  | 2.42 ± 1.74 | 0.11 |
| Fluoride | 0.09 ± 0.10 |  | 0.35 ± 0.22 | <0.001* |
| Chloride | 2.02 ± 2.06 |  | 1.66 ± 1.29 | 0.45 |
| Nitrate | 4.02 ± 1.92 |  | 3.36 ± 1.74 | 0.28 |
| Sulfate | 16.16 ± 4.28 |  | 11.01 ± 3.46 | <0.001* |

**Table S4:** Ambient concentrations of PM10 mass and inorganic ions measured at Bode in the Kathmandu Valley.

| **Species** | **Overall** |  | **Daytime**  **(8:00 am – 5:30 pm)** | |  | **Nighttime**  **(6:00 pm – 7:30 am)** | |
| --- | --- | --- | --- | --- | --- | --- | --- |
| **Mean ± s1** |  | **Mean ± s** | **Range** |  | **Mean ± s** | **Range** |
| **PM10 mass** (µg m-3) | 118.8 ± 56.2 |  | 117.0 ± 56.0 | 52.0-211.8 |  | 122.2 ± 56.4 | 53.6-294.0 |
| **Inorganic ions** (µg m-3) | |  |  |  |  |  |  |
| Ammonium | 5.8 ± 2.8 |  | 4.2 ± 1.0 | 2.7-6.1 |  | 8.6 ± 3.3 | 3.3-16.6 |
| Sodium | 0.10 ± 0.10 |  | 0.21 ± 0.02 | 0.004-0.050 |  | 0.02 ± 0.02 | 0.002-0.056 |
| Potassium | 0.55 ± 0.22 |  | 0.55 ± 0.22 | 0.26-1.01 |  | 0.70 ± 0.34 | 0.42-1.66 |
| Calcium | 0.65 ± 0.50 |  | 3.5 ± 2.3 | 0.08-6.78 |  | 1.6 ± 1.1 | 0.11-4.03 |
| Magnesium | 0.04 ± 0.03 |  | 0.22 ± 0.12 | 0.04-0.41 |  | 0.11 ± 0.05 | 0.04-0.18 |
| Nitrate | 2.7 ± 1.7 |  | 4.6 ± 2.7 | 2.2-11.8 |  | 5.6 ± 2.8 | 2.8-12.6 |
| Sulfate | 10.2 ± 3.7 |  | 9.6 ± 2.3 | 6.6-15.3 |  | 14.1 ± 3.9 | 6.9-22.5 |
| Chloride | 1.5 ± 1.6 |  | 0.59 ± 0.42 | 0.07-1.40 |  | 3.3 ± 1.7 | 0.44-7.04 |
| Fluoride | 0.05 ± 0.02 |  | 0.23 ± 0.15 | 0.07-0.59 |  | 0.40 ± 0.32 | 0.07-1.23 |

1. s = standard deviation

**Figure S1:** (a) Location of the Kathmandu Valley in the wider geographic region (source: Google Maps) and (b) the location of Bode in the Kathmandu Valley (source: Google Earth).

(a)


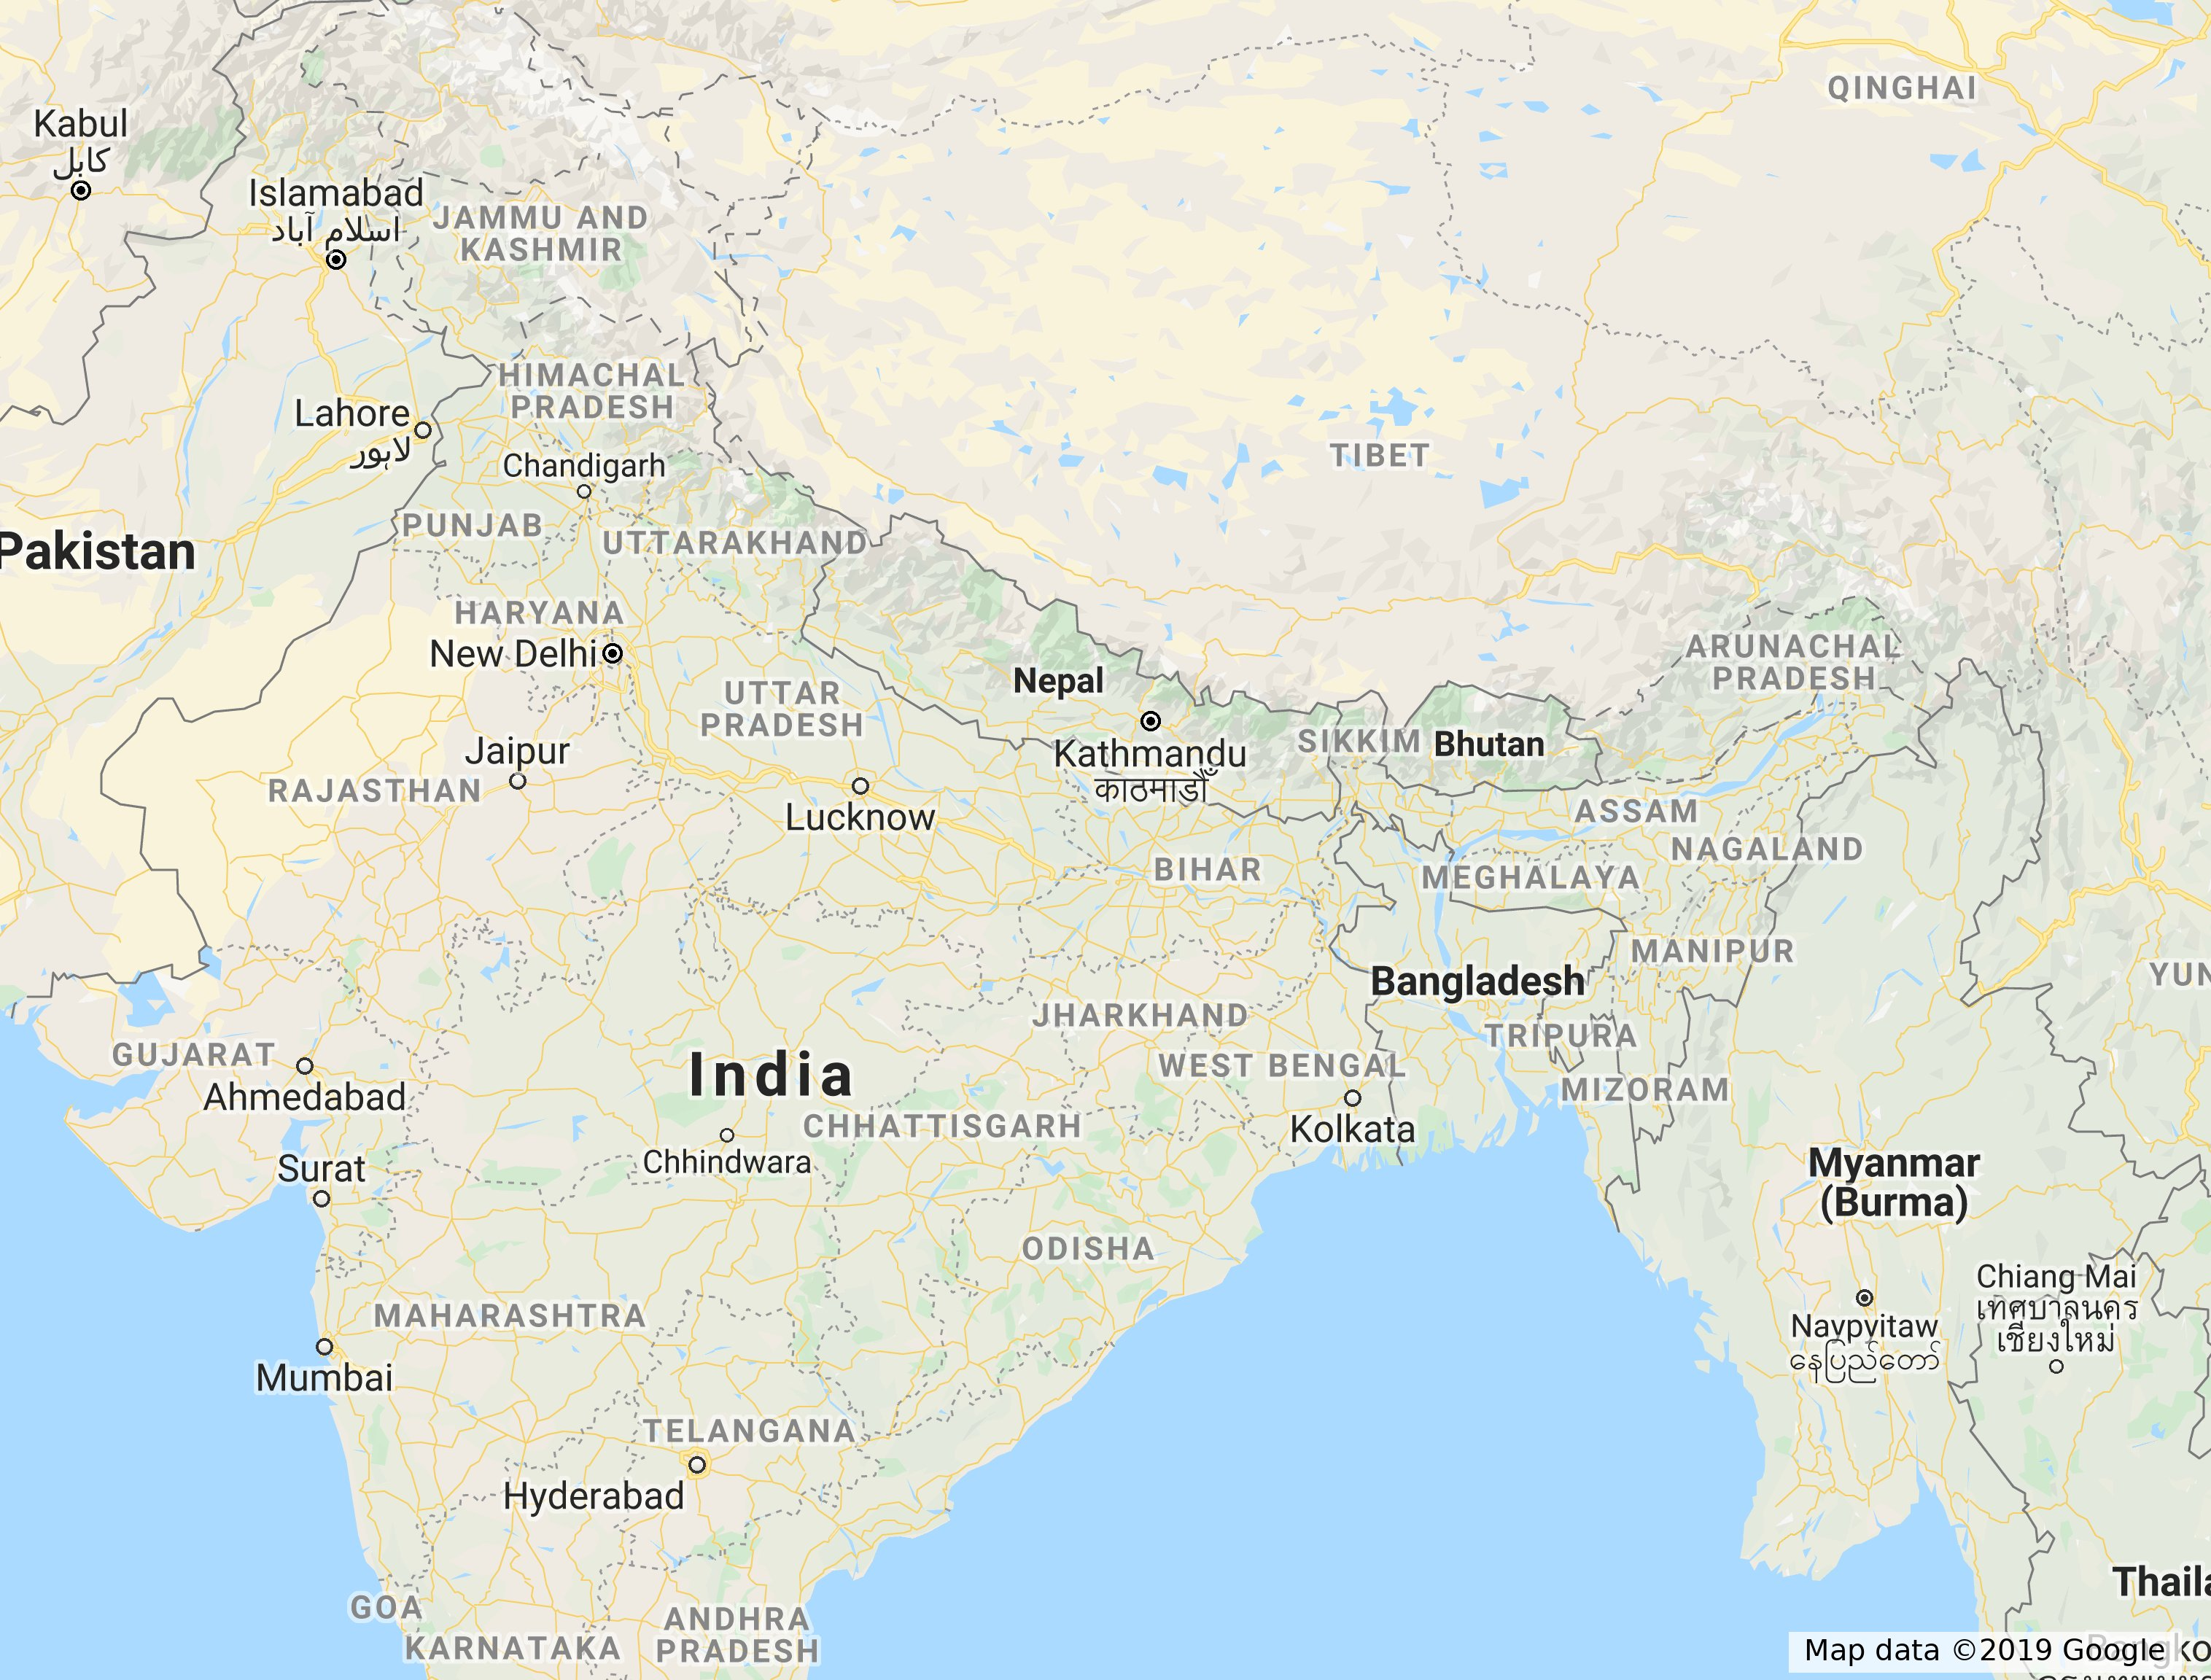

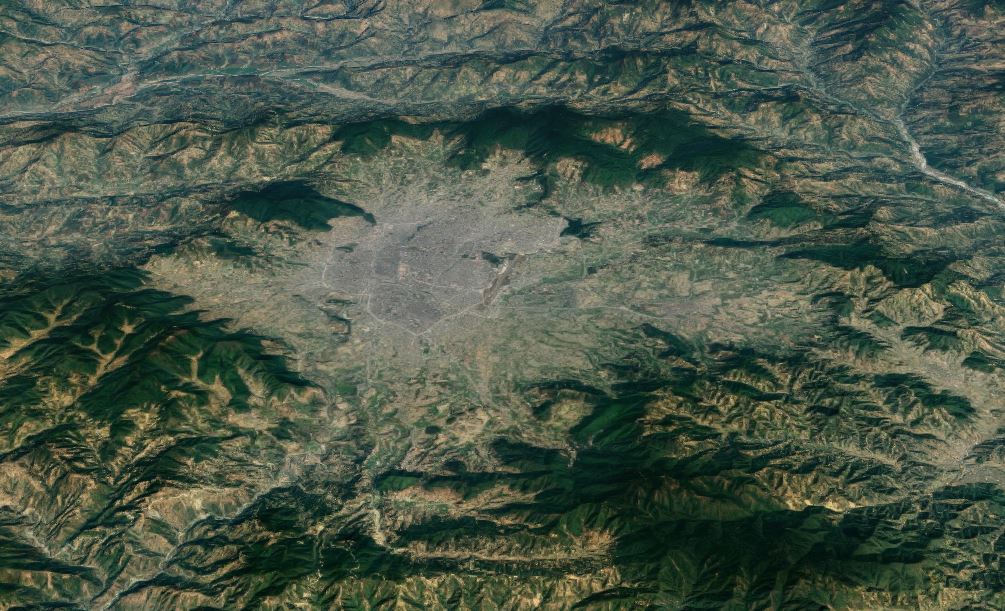


Kathmandu Valley

Imagery ©2019 Maxar Technologies, CNES / Airbus,

Imagery ©2019 TerraMetrics, Map data ©2019

Godavari

Lalitpur

Bhaktapur

Kathmandu

N

(b)

**Bode**

**Figure S2:** Comparison of CMB model performance metrics for the sensitivity tests using different biomass and garbage burning profiles. The R2 values (a) represent the fraction of the variance measured in the ambient PM2.5 explained by the model. The χ2 values (b) represent differences between the measured and calculated fitting species concentrations. Two garbage burning profiles did not show significant differences in their performance metrics.

**Figure S3:** Apportionment of primary and secondary sources for PM2.5 EC based on CMB modeling.

**Figure S4:** Sensitivity of CMB model results to the input source profiles: (a) sensitivity of garbage burning contributions to PM2.5 EC to the garbage burning profile and (b) sensitivity of biomass burning contributions to PM2.5 EC to biomass burning profiles.

**Works cited**

Al-Naiema, I., Estillore, A. D., Mudunkotuwa, I. A., Grassian, V. H., and Stone, E. A.: Impacts of co-firing biomass on emissions of particulate matter to the atmosphere, Fuel, 162, 111-120, doi:10.1016/j.fuel.2015.08.054, 2015.

Nolte, C. G., Schauer, J. J., Cass, G. R., and Simoneit, B. R.: Trimethylsilyl derivatives of organic compounds in source samples and in atmospheric fine particulate matter, Environ. Sci. Technol., 36, 20, 4273-4281, 2002.

Stone, E. A., Nguyen, T. T., Pradhan, B. B., and Dangol, P. M.: Assessment of biogenic secondary organic aerosol in the Himalayas, Environ. Chem., 9, 3, 263-272, doi:10.1071/en12002, 2012.
