# Supplementary material for: Ambient air quality in the Kathmandu Valley, Nepal, during the pre-monsoon: concentrations and sources of particulate matter and trace gases
Source: Copernicus journal article supplement (doi:10.5194/acp-20-2927-2020), 2020-03-11
Supplement: Supplementary file 1 [file Table S1-S2.xlsx]

## Sheet: Table S1
Table S1: Average, standard deviation, minimum, maximum, and relative standard deviation of the spike recoveries as an indication of reproduciblity of organic species analysis and the method detection limit.
Compound	Spike recovery (%)				% RSD of spike recevery	Method detection limit (pg µL-1)
	Mean	Standard deviation	Minimum	Maximum
Phenanthrene	88.929	6.25308	80.505	97.33	7.03154	12.6415
Anthracene	87.233	5.22894	80.77	93.63	5.99423	3.13424
Fluoranthene	94.33	7.41963	86.0675	105.802	7.86561	4.89686
Pyrene	97.651	9.23624	89.05	112.06	9.45842	3.75974
Methylfluoranthene	101.462	7.44022	91.5	111.65	7.33301	4.89686
9-Methylanthracene	89.7942	5.55244	83.274	96.215	6.18352	6.26622
Benzo(GHI)fluoranthene	109.681	4.67826	103.75	115.785	4.26534	4.31666
Cyclopenta(cd)pyrene	87.452	8.45387	81.66	102.405	9.66686	3.14556
Benz(a)anthracene	96.885	9.0036	85.585	108.41	9.29308	3.69773
Chrysene	101.195	6.2931	93.13	108.69	6.21879	3.09407
1-Methylchrysene	103	6.07179	95.97	112.525	5.89495	2.9543
Retene	104.505	9.54987	90.278	113.478	9.13818	9.98473
Benzo(b)fluoranthene	101.195	10.1936	90.7525	114.085	10.0732	8.03109
Benzo(k)fluoranthene	106.339	5.72916	102.505	116.305	5.38764	7.43145
Benzo(j)fluoranthene*	N/A	N/A	N/A	N/A	N/A	7.4
Benzo(e)pyrene	110.447	6.91283	98.575	115.5	6.25895	4.87223
Benzo(a)pyrene	100.895	4.3523	95.69	105	4.3137	3.45408
Perylene	94.5437	13.2557	84.95	113.985	14.0207	3.78994
Indeno(1,2,3-cd)pyrene	103.19	13.2769	87.135	118.995	12.8664	2.36781
Benzo(GHI)perylene	105.416	9.42134	93.6025	117.485	8.9373	5.44122
Dibenz(ah)anthracene	105.194	8.11176	96.7325	116.567	7.71124	8.44619
Picene	108.286	7.1683	98.33	116.4	6.61979	5.01819
1,3,5-triphenylbenzene	92.096	9.91563	80.155	103.79	10.7666	3.26
17A(H)-22,29,30-Trisnorhopane	99.88	4.38288	95.82	107.07	4.38815	1.49778
17B(H)-21A(H)-30-Norhopane	106.516	5.75299	100.4	115.32	5.40106	1.58346
17A(H)-21B(H)-Hopane	107.604	8.75873	94.63	116.71	8.13978	1.41732
22S-Homohopane *	N/A	N/A	N/A	N/A	N/A	1.41732
22R-Homohopane *	N/A	N/A	N/A	N/A	N/A	1.41732
22S-Bishomohopane *	N/A	N/A	N/A	N/A	N/A	1.41732
22R-Bishomohopane *	N/A	N/A	N/A	N/A	N/A	1.41732
22S-Trishomohopane*	N/A	N/A	N/A	N/A	N/A	1.41732
22R-Trishomohopane*	N/A	N/A	N/A	N/A	N/A	1.41732
ABB-20R-C27-Cholestane	102.382	5.51508	94.93	110.07	5.38676	4.51929
ABB-20S-C27-Cholestane	97.464	8.73513	84.78	108.44	8.96242	5.88046
AAA-20S-C27-Cholestane *	N/A	N/A	N/A	N/A	N/A	5.88046
ABB-20R-C28-Ergostane	100.292	3.96195	96.14	104.84	3.95042	2.43173
ABB-20S-C28-Ergostane *	N/A	N/A	N/A	N/A	N/A	2.43173
ABB-20R-C29-Sitostane	101.56	3.3841	99.33	107.47	3.33211	3.54571
ABB-20S-C29-Sitostane *	N/A	N/A	N/A	N/A	N/A	3.54571
Tetradecane	100.506	14.2728	84.0256	114.184	14.2009	1272.57
Pentadecane	104.134	9.3211	91.9785	112.425	8.95107	985.236
Hexadecane	99.1658	7.74053	89.9251	107.626	7.80564	1012.85
Norpristane	95.2717	5.68031	89.2827	101.643	5.96222	73.163
Heptadecane	95.4097	9.42678	83.8081	105.062	9.88032	719.51
Pristane	96.8185	5.59611	90.1269	103.08	5.78	361.075
Octadecane	93.829	4.93441	88.9149	101.275	5.25894	68.9942
Phytane	93.2257	2.77856	90.0082	96.895	2.98046	168.167
Nonadecane	97.1129	5.60683	90.3919	103.382	5.77351	276.857
Eicosane	98.2157	9.38082	89.4893	111.595	9.55124	352.35
Heneicosane	101.402	9.06634	91.7101	111.402	8.941	74.6458
Docosane	106.83	7.99193	94.8659	113.762	7.48096	958.846
Tricosane	101.592	7.55893	89.4519	110.362	7.44045	228.063
Tetracosane	105.473	8.38861	98.8257	119.58	7.9533	394.641
Squalane	97.6264	12.6538	81.022	112.7	12.9615	100.068
Pentacosane	101.595	7.86905	91.7755	113.438	7.74547	397.042
Hexacosane	98.5834	9.16241	91.2059	114.042	9.29408	521.666
Heptacosane	99.0571	6.28439	88.5431	104.356	6.34421	253.612
Octacosane	91.1194	2.70569	87.0649	93.8857	2.96939	311.783
Nonacosane	96.226	2.77613	93.5706	100.631	2.88502	558.706
Triacontane	87.0657	3.5114	83.3239	91.8991	4.03304	484.481
Hentriacontane	100.879	4.90052	95.0996	107.212	4.85783	396.625
Dotriacontane	91.5455	5.32903	83.1175	96.5663	5.82118	251.698
Tritriacontane	101.079	11.8695	81.8989	110.779	11.7428	460.728
Tetratriacontane	103.928	11.2426	89.9039	115.329	10.8177	499.045
Pentatriacontane	99.6686	8.53715	86.0092	108.383	8.56554	187.65
Hexatriacontane	88.1429	7.4195	80.3369	99.7549	8.41758	327.12
Heptatriacontane	105.49	8.25858	93.0349	113.518	7.82879	311.957
Octriacontane	106.712	6.73022	98.1621	116.697	6.3069	422.07
Nonatriacontane	98.1679	6.10906	92.1544	107.498	6.22308	369.965
Tetracontane	99.6018	7.90294	88.9369	110.845	7.93453	491.42
Levoglucosan	90	10.4722	82.5	105.5	11.6358	1642.94
Cholesterol	87.3099	3.4012	83.3908	91.6433	3.89555	146.2
Stigmasterol	92.1702	3.21032	88.1445	95.299	3.48304	10.3587
b-Sitosterol	98.4012	5.35182	90.1521	104.112	5.43877	242.525
Campesterol	102.142	5.74938	94.7656	109.006	5.62882	27.9345
Cholestanol / Coprostanol	88.6052	4.23626	83.707	94.233	4.78105	39.0306
Stigmastanol	99.5588	4.87316	93.88	103.597	4.89476	50.8289
PNA (cis-Pinonic acid)	95.1193	3.81576	89.947	98.044	4.01156	100
β-caryophyllinic acid*	N/A	N/A	N/A	N/A	N/A	100
Phthalic acid	104.871	1.52985	103.471	106.251	1.45879	75
4-Methylphthalic acid	99.5307	8.34496	89.1907	109.347	8.38431	75
Meso-erythritol	96.2	3.63868	94	100.4	3.78241	50
I-2 (2-methylthreitol)*	N/A	N/A	N/A	N/A	N/A	50
I-3 (2-methylerythreitol)*	N/A	N/A	N/A	N/A	N/A	50
N/A = Not Applicable
*Denotes compounds that were semi-quantified using the preceding compound as a surrogate standard. Spike recoveries and method detection limits were obtained from the surrogate standard.
Method detection limits (pg µL-1) can be converted to the ambient concentration ng m-3 by multiplying by the final sample volume (100 µL) and dividing by the average sampled air volume (4.04 m3 for daytime and 5.63 m3 for nighttime), and dividing by 1000 for unit conversion.

## Sheet: Table S2
Table S2: Concentrations of methane, CO, CO2, COS, and select non-methane volatile organic compounds (NMVOC) measured at Bode in April 2015. Units are pptv, unless noted. bdl = below the limit of detection; n/a = not available.
Date	2015-04-16	2015-04-17	2015-04-18	2015-04-19	2015-04-20	2015-04-21	2015-04-22	2015-04-23	2015-04-24
Time (Local)	19:00:00	08:00:00	08:25:00	06:48:00	07:25:00	18:35:00	18:16:00	18:40:00	18:23:00
CH4 (ppbv)	1931	2029	2006	1967	2032	2188	1934	1976	1926
CO (ppbv)	448	531	509	362	821	584	414	486	2737
CO2 (ppmv)	429	435	433	421	435	424	419	415	416
COS	473	586	1130	562	555	596	566	690	786
DMS	6	21	5	12	15	17	10	6	3
CFC-12	535	526	538	529	556	542	527	518	545
CFC-11	236	237	286	237	254	258	239	230	245
CFC-113	72.9	79.2	72.6	72.4	72.7	71.9	72.1	73.9	80.9
CFC-114	15.5	15.7	15.7	16.6	15.9	15.9	16.7	15.8	18.5
H-1211	3.58	3.58	4.18	3.63	3.73	3.66	3.7	3.61	4
H-1301	3.2	3.3	3	3.2	3.4	3.3	3.2	3.1	3.4
HFC-152a	11.9	31.8	348	12.1	13.6	14.6	13.1	11.4	18.8
HFC-134a	79.5	82.3	98.7	82.9	79.9	82.1	86.4	79.3	91.3
HCFC-22	242	241	255	247	245	242	252	242	283
HCFC-142b	24.7	25.3	30	25.6	24.7	25.4	25.9	27.4	28.3
HCFC-141b	31.6	28.5	123	26.1	26.2	35.7	26.3	25.1	29.5
CHCl3	17.5	22	35.5	20.2	26.6	41.3	42.2	19.8	23
CH3CCl3	3.16	3.31	3.4	3.4	3.52	3.28	3.57	3.2	3.42
CCl4	80.9	80.9	82.9	83.3	88.8	85.2	86.1	80.9	86.8
CH2Cl2	84	101	184	36	52	124	58	145	146
C2HCl3	0.4	1.1	5.7	0.5	0.5	2.4	0.7	0.4	0.9
C2Cl4	2.2	32	75	5.7	3.6	32	6.6	5.7	4.2
CH3Cl	862	1415	727	913	809	881	673	696	888
CH3Br	14	18	21	9	8.9	8	8.3	8.5	12
CH3I	3.7	1.8	1.2	1.1	1.5	0.95	0.54	1.4	2.4
CH2Br2	0.77	0.78	0.8	0.71	0.72	0.79	0.8	0.65	0.68
CHBrCl2	0.38	0.37	0.54	0.37	0.34	0.4	0.37	0.26	0.34
CHBr2Cl	bdl	0.2	bdl	0.19	0.15	0.17	0.2	0.12	0.17
CHBr3	0.57	0.7	1.15	0.9	0.77	1.1	0.96	1	0.72
Ethylchloride	5.6	40	13.5	5.3	5.5	9.8	5.4	3.9	17.9
1,2-DCE	29.4	30.9	95.3	18.7	23.2	20.2	26.8	20.8	53.6
Ethane	2083	2729	2198	1881	2743	2647	1694	2553	2123
Ethene	3403	4582	1903	1590	4641	4169	2676	3260	2590
Ethyne	1840	3577	2226	2164	6307	3499	3765	2683	1512
Propane	685	3847	5773	1272	2060	1488	1172	1390	750
Propene	539	3513	2206	1493	3482	2152	1677	1442	806
i-Butane	280	2658	3208	1066	1869	1285	1503	991	404
n-Butane	232	2468	2083	1091	2108	1270	1935	985	378
1-Butene	47	852	487	371	710	513	590	242	134
i-Butene	120	2806	1353	729	983	819	822	464	256
trans-2-Butene	38	613	302	334	597	331	544	165	67
cis-2-Butene	26	475	221	277	506	287	464	128	57
i-Pentane	98	2068	6069	1203	1375	1604	2223	915	355
n-Pentane	27	645	1254	329	451	451	633	264	94
1,3-Butadiene	24	191	bdl	72	277	166	166	bdl	46
1-Pentene	bdl	181	96	84	127	112	150	50	50
Isoprene	bdl	98	bdl	78	237	64	89	bdl	bdl
trans-2-Pentene	bdl	165	116	139	181	136	284	83	36
cis-2-Pentene	47	79	40	68	95	84	142	bdl	bdl
3-Methyl-1-butene	bdl	75	63	46	67	59	71	27	24
1,2-Propadiene	bdl	51	25	bdl	89	51	50	23	bdl
Propyne	bdl	112	49	bdl	145	109	96	41	bdl
1-Butyne	bdl	bdl	bdl	bdl	bdl	bdl	bdl	bdl	bdl
2-Butyne	bdl	bdl	bdl	bdl	bdl	25	bdl	bdl	bdl
n-Hexane	34	804	664	220	211	141	308	156	102
n-Heptane	24	290	1184	94	120	103	243	55	57
n-Octane	bdl	125	301	77	101	59	173	53	57
n-Nonane	37	98	66	311	415	44	231	297	159
2,3-Dimethylbutane	bdl	115	120	60	63	66	124	43	22
2-Methylpentane	bdl	304	265	145	153	130	302	83	56
3-Methylpentane	bdl	257	214	106	107	bdl	199	66	43
2,2,4-Trimethylpentane	53	168	570	34	56	bdl	70	bdl	bdl
Cyclopentane	bdl	105	bdl	70	66	95	102	bdl	bdl
Cyclohexane	bdl	736	2992	153	208	bdl	276	bdl	bdl
Methylcylohexane	bdl	329	2175	87	92	bdl	160	45	bdl
Benzene	857	2185	586	658	1134	1203	977	749	731
Toluene	366	1329	1836	683	1064	1108	1573	627	303
Ethylbenzene	57	377	714	178	217	177	417	164	112
m/p-Xylene	198	1017	1168	1390	1716	713	2260	804	740
o-Xylene	125	398	330	733	858	211	891	204	414
Styrene	67	61	bdl	54	82	95	37	bdl	25
i-Propylbenzene	bdl	bdl	bdl	bdl	bdl	bdl	bdl	bdl	bdl
n-Propylbenzene	45	49	23	68	73	bdl	68	30	43
3-Ethyltoluene	114	119	67	132	146	51	184	82	78
4-Ethyltoluene	51	46	24	67	53	28	65	40	45
2-Ethyltoluene	60	78	24	120	134	bdl	117	31	71
1,3,5-Trimethylbenzene	76.8083	82.8878	29.2501	117.288	140.28	29.1989	130.156	41.9643	66.6162
1,2,4-Trimethylbenzene	352.546	331.72	95.9877	431.517	584.809	83.7399	461.267	141.833	272.785
1,2,3-Trimethylbenzene	178.597	291.586	35.7112	381.697	569.497	34.8303	331.352	96.842	272.879
alpha-Pinene	bdl	220	297	33	32	60	35	bdl	bdl
beta-Pinene	bdl	166	181	24	36	bdl	59	bdl	bdl
Methanol	3594	5912	7977	4718	4321	3939	3063	2818	3071
Ethanol	3973	9845	4474	3002	2781	5154	3342	4936	1508
Acetaldehyde	1559	8057	15148	2662	2994	5642	3527	3418	4118
Butanal	104	330	560	145	122	617	205	175	370
Butanone	484	1239	2	479	650	851	709	3629	748
